# Supplementary material for: Assembly of Soft Electrodes and Ion Exchange Membranes for Capacitive Deionization
Source: PubMed Central journal article supplement (PMC6836081; doi:10.3390/polym11101556), 2019-09-25
Supplement: polymers-11-01556-s001.pdf [file polymers-11-01556-s001.pdf]

# Supplementary Materials: Assembly of Soft Electrodes and Ion Exchange Membranes for Capacitive Deionization

Silvia Ahualli <sup>1,\*</sup>, Sergio Orozco-Barrera <sup>1</sup>, María del Mar Fernández <sup>2</sup>, Ángel V. Delgado <sup>1</sup> and Guillermo R. Iglesias <sup>1,\*</sup>

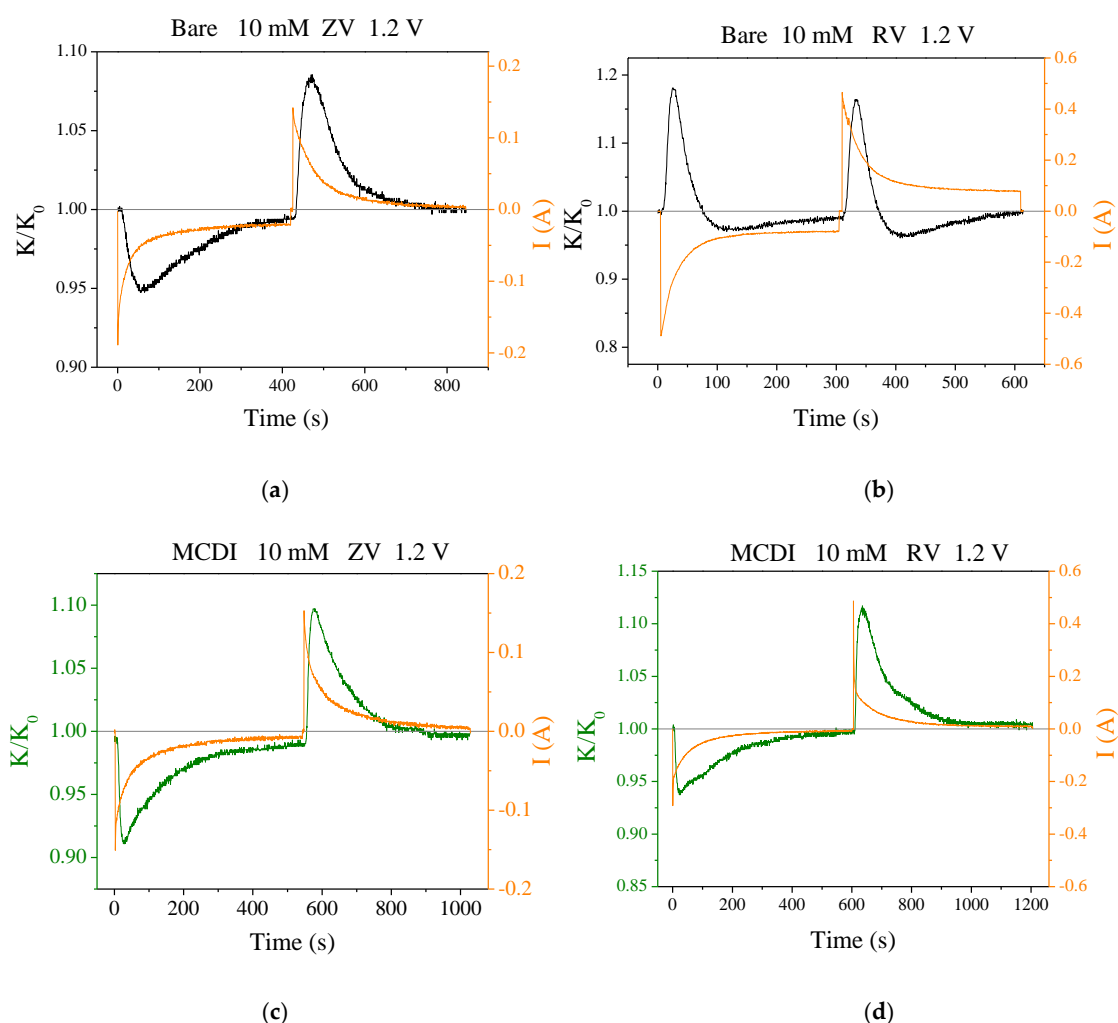

**Figure 1.** Exit solution conductivity,  $K$ , relative to that of the 10 mM NaCl feed solution,  $K_0$ , and current intensity, for bare carbon electrodes (top) and MCDI (bottom) while applying 1.2 V at ZV (a and c) and RV (b and d) in the desorption step.

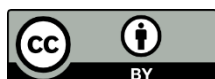

© 2019 by the authors. Submitted for possible open access publication under the terms and conditions of the Creative Commons Attribution (CC BY) license (<http://creativecommons.org/licenses/by/4.0/>).
